# Supplementary material
Source: PubMed Central journal article supplement (PMC3162214)
Supplement: NIHMS317892-supplement-supplement_1.pdf [file NIHMS317892-supplement-supplement_1.pdf]

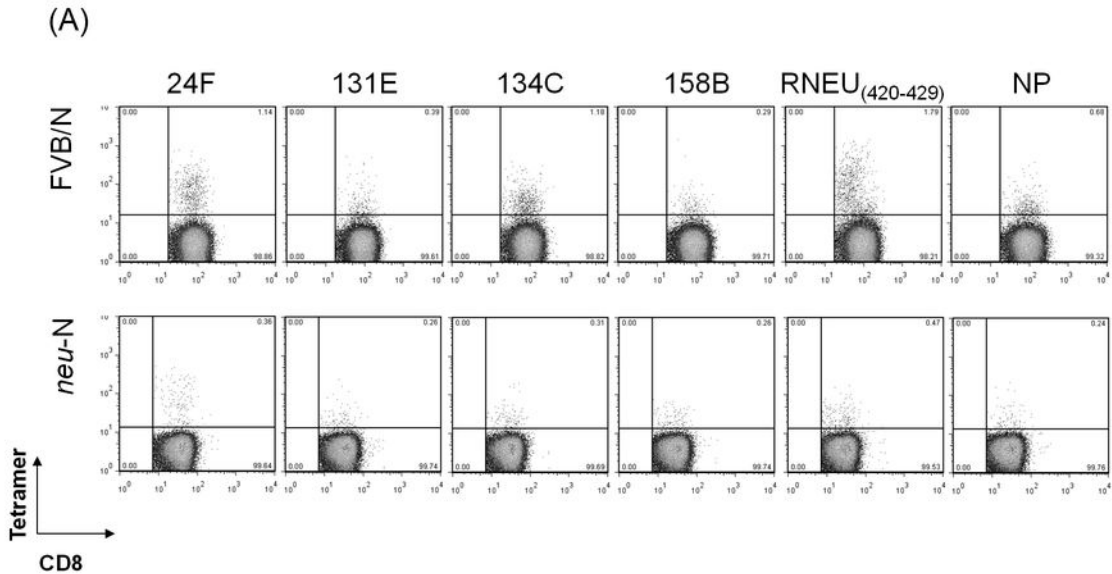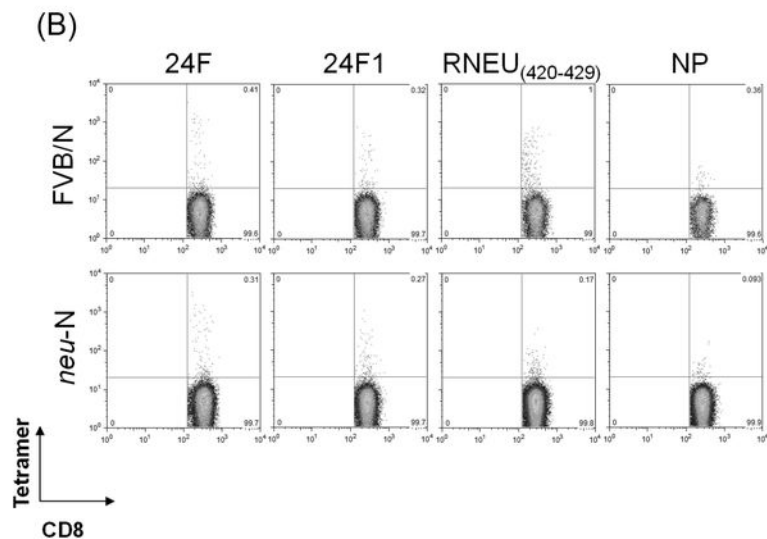

**Supplemental Figure 1: Lower relative avidities are detected among non-dominant CD8<sup>+</sup> T cell responses when compared with RNEU<sub>(420-429)</sub> T cell responses in FVB/N and *neu-N* mice.** Representative tetramer stains for both FVB/N and *neu-N* mice corresponding to Figure 4A and C (A) as well as Figure 4B and D (B). Plots are gated on CD8<sup>+</sup> lymphocytes and show the 1:50 dilution of tetramer (20 $\mu$ g/ml).
